# Supplementary material for: A composite approach to synthesize a high-performance Pt/WO3–carbon catalyst for optical and electrocatalytic applications
Source: Royal Society of Chemistry journal article supplement (doi:10.1039/d2nj01497a), 2022-01-01
Supplement: d2nj01497a1.pdf [file d2nj01497a1.pdf]

### Supporting Information

## **A composite approach to synthesize highly performed Pt/WO<sub>3</sub>-Carbon catalyst for optical and electrocatalytic properties**

Rabia Naeem,<sup>ab</sup>, Saba Afzal,<sup>c</sup> Muhammad Adil Mansoor,<sup>d</sup> Khadija Munawar,<sup>b</sup> Bibi Sherino,<sup>c</sup>  
Riaz Ahmed,<sup>e</sup>

<sup>a</sup>Department of Chemistry Government College University Lahore, Pakistan

<sup>b</sup>Department of Chemistry, Faculty of Science University of Malaya, Kuala Lumpur Malaysia.

<sup>c</sup>Department of Chemistry, Sardar Bahadur Khan Women's University Quetta, Pakistan

<sup>d</sup>Department of Chemistry, School of Natural Sciences, National University of Sciences and  
Technology (NUST), H-12 Campus, Islamabad, Pakistan

<sup>e</sup>Department of Chemistry, Quaid-i-Azam University Islamabad-45320, Pakistan

corresponding email id: rabianaem49@yahoo.com

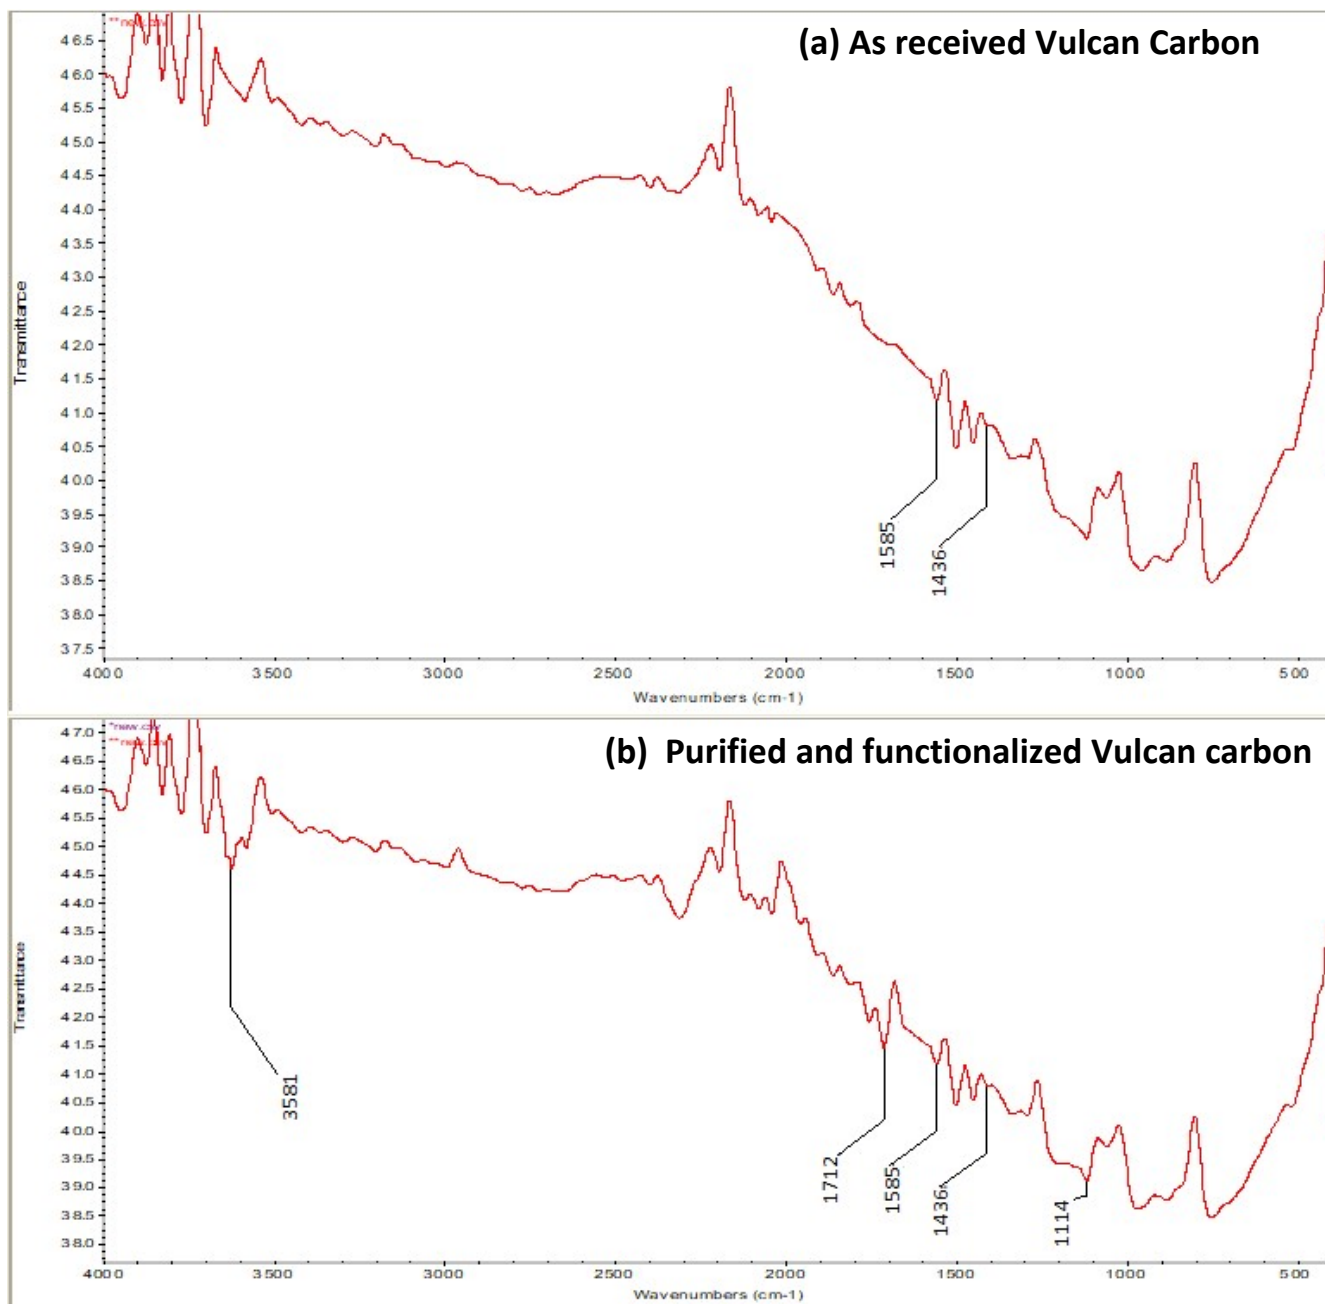

**Figure S1:** FTIR spectra of as (a) received (b) purified and functionalized vulcan carbon

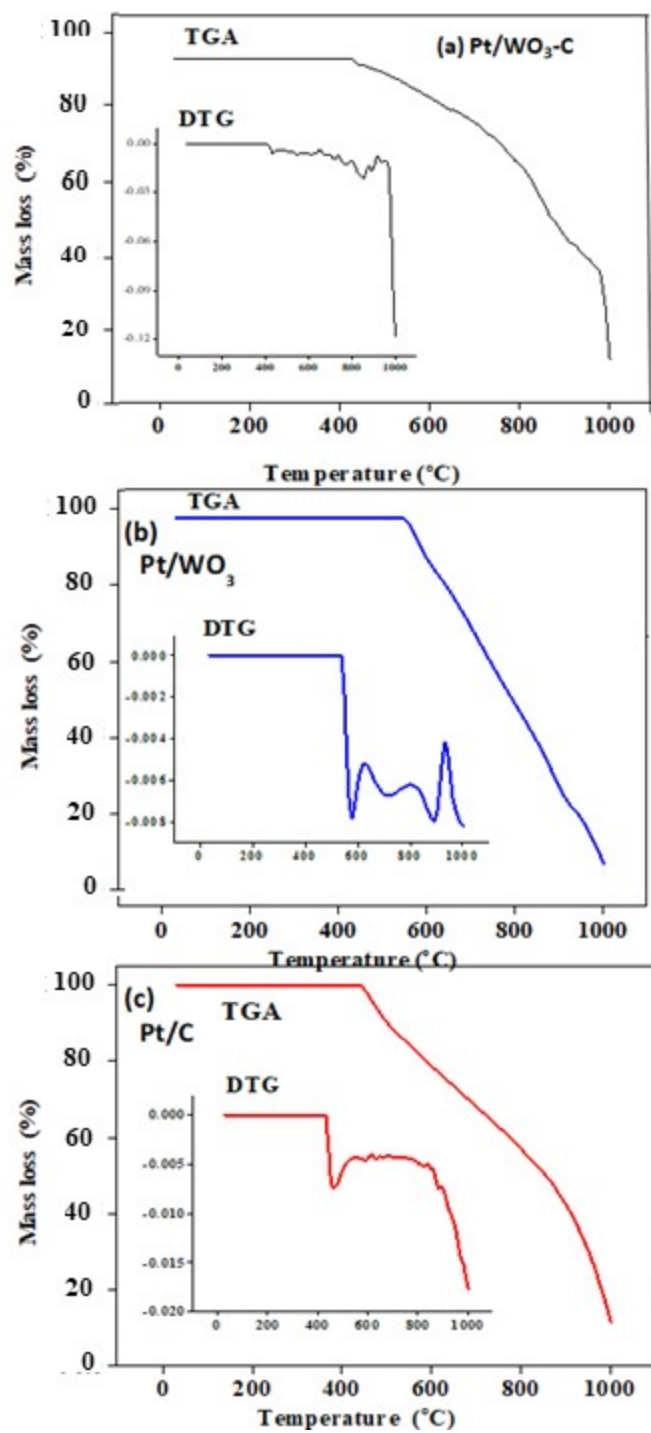

**Figure S2:** TGA and DTG of Pt-WO<sub>3</sub>/C, Pt/WO<sub>3</sub>, and Pt/C catalysts in air, heating rate 20 °C/min

**Table S1:** Optimization data of Catalysts with different composition having Electrochemical surface area (ECSA) and peak current

| <i>Catalyst</i>                  | <i>%w/w Pt in</i> | <i>%w/w WO<sub>3</sub> in</i> | <i>%w/w C in</i> | <i>ECSA</i>            | <i>Peak current</i>      |
|----------------------------------|-------------------|-------------------------------|------------------|------------------------|--------------------------|
|                                  | <i>Catalyst</i>   | <i>Catalyst</i>               | <i>Catalyst</i>  | <i>m<sub>2</sub>/g</i> | <i>mA/cm<sup>2</sup></i> |
| <i>PWC 1 Pt/WO<sub>3</sub>-C</i> | 5                 | 15                            | 80               | 362                    | 17                       |
| <i>PWC 2 Pt/WO<sub>3</sub>-C</i> | 10                | 10                            | 80               | 498                    | 28                       |
| <i>PWC 3 Pt/WO<sub>3</sub>-C</i> | 15                | 5                             | 80               | 472                    | 26                       |
| <i>Pt/WO<sub>3</sub></i>         | 10                | 90                            | n/a              | 447                    | 12                       |
| <i>Pt/C</i>                      | Pt                | n/a                           | 90               | 132                    | 4                        |

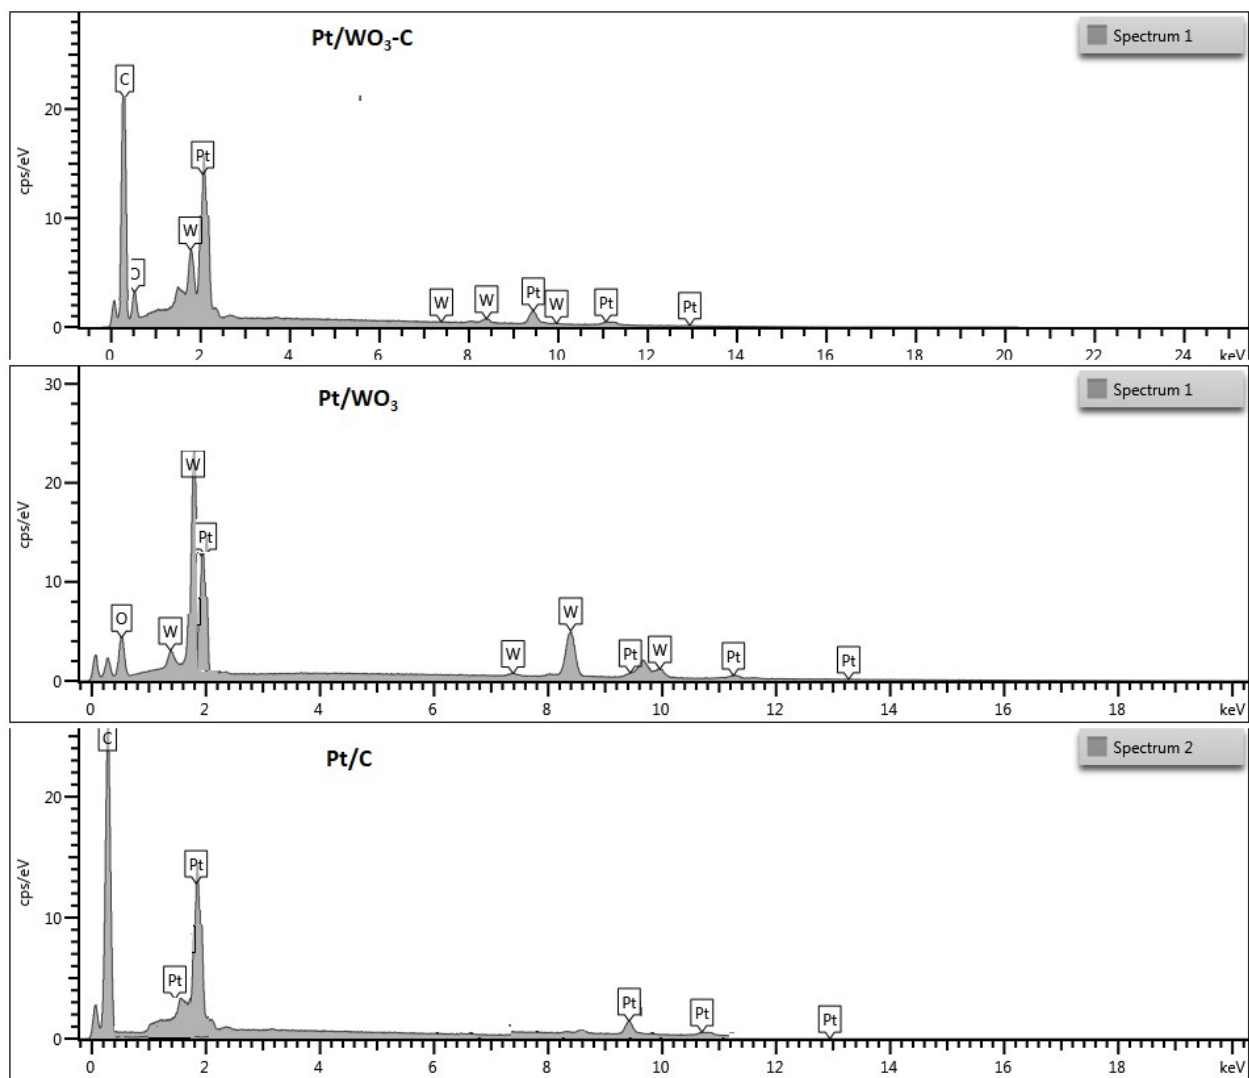

Figure S3: EDX spectra of Pt/WO<sub>3</sub>-C, Pt/WO<sub>3</sub> and Pt/C

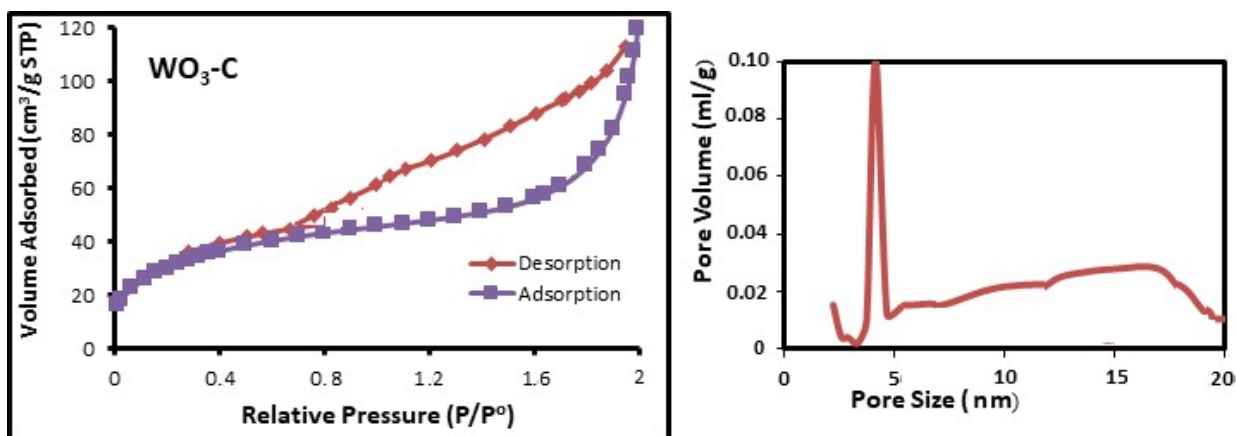

Figure S4: N<sub>2</sub> adsorption-desorption isotherm and (a) pore size distribution curve of WO<sub>3</sub>-C

Table S2: Compositional analysis of catalysts from EDX results

| Catalysts             | C %   | Pt % | W%    | O %  | Total |
|-----------------------|-------|------|-------|------|-------|
| Pt/WO <sub>3</sub> -C | 78.9  | 9.28 | 7.6   | 4.2  | 100   |
| Pt/WO <sub>3</sub>    | ..... | 9.31 | 79    | 21.0 | 100   |
| Pt/C                  | 86.0  | 9.16 | ..... | 4.64 | 100   |

Table S3: Electrochemical surface area, Q<sub>Pt-H/C</sub> and Roughness factor from CVs in 1M H<sub>2</sub>SO<sub>4</sub> on Pt/WO<sub>3</sub>-C, Pt/WO<sub>3</sub> and Pt/C catalysts

| Catalysts             | Mass of Pt/mg | Q <sub>Pt-H/ C</sub> | S <sub>ESA</sub> /m <sup>2</sup> ·g <sup>-1</sup> | RSA (cm <sup>2</sup> ) | Roughness Factor |
|-----------------------|---------------|----------------------|---------------------------------------------------|------------------------|------------------|
| Pt/C                  | 0.16          | 4460                 | 132                                               | 21.24                  | 27.10            |
| Pt/WO <sub>3</sub>    | 0.16          | 15019                | 447                                               | 71.52                  | 91.10            |
| Pt/WO <sub>3</sub> -C | 0.16          | 16750                | 498                                               | 79.76                  | 101.60           |

**Table S4:** Activity parameters evaluated from CVs in 1M CH<sub>3</sub>OH + 1M H<sub>2</sub>SO<sub>4</sub> on various Pt/WO<sub>3</sub>-C, Pt/WO<sub>3</sub> and Pt/C catalysts.

| Catalysts             | Peak potential<br>E <sub>p</sub> /V | Peak Current<br>I <sub>p</sub> /(mA) | Specific activity<br>I <sub>s</sub> /mA·cm <sup>-2</sup> | Mass activity<br>I <sub>m</sub> /mA·mg <sup>-1</sup> Pt |
|-----------------------|-------------------------------------|--------------------------------------|----------------------------------------------------------|---------------------------------------------------------|
| Pt/C                  | 0.670                               | 4.87                                 | 6.20                                                     | 30.4                                                    |
| Pt/WO <sub>3</sub>    | 0.695                               | 12.07                                | 15.4                                                     | 75.4                                                    |
| Pt/WO <sub>3</sub> -C | 0.736                               | 28.75                                | 36.6                                                     | 180                                                     |

**Table S5:** Polarization data evaluated from Tafel plots in 1M CH<sub>3</sub>OH + 1M H<sub>2</sub>SO<sub>4</sub>

| Catalysts             | Tafel's slope "b"<br>/(V decade <sup>-1</sup> ) | α <sub>n</sub> | Intercept of E<br>vs Log i | i <sup>0</sup> mA·cm <sup>-2</sup> |
|-----------------------|-------------------------------------------------|----------------|----------------------------|------------------------------------|
| Pt/C                  | 0.178                                           | 0.331          | 1.049                      | 5.65                               |
| Pt/WO <sub>3</sub>    | 0.321                                           | 0.184          | 1.156                      | 33.8                               |
| Pt/WO <sub>3</sub> -C | 0.330                                           | 0.179          | 1.176                      | 34.4                               |

**Table S6:** Activity parameters evaluated from CVs in 1M CH<sub>3</sub>OH + 1M KOH on Pt/WO<sub>3</sub>-C, Pt/WO<sub>3</sub>, Pt/C catalysts

| Catalysts             | Peak potential<br>E <sub>p</sub> /V | Peak Current<br>I <sub>p</sub> /(mA) | Specific activity<br>j/mA·cm <sup>-2</sup> | Mass activity<br>mA/g Pt |
|-----------------------|-------------------------------------|--------------------------------------|--------------------------------------------|--------------------------|
| Pt/C                  | -0.153                              | 26.37                                | 33.592                                     | 165                      |
| Pt/WO <sub>3</sub>    | -0.136                              | 27.61                                | 35.172                                     | 172                      |
| Pt/WO <sub>3</sub> -C | -0.126                              | 43.0                                 | 54.777                                     | 269                      |

**Table S7:** Polarization data evaluated from Tafel plots in 1M CH<sub>3</sub>OH + 1MKOH.

| Catalysts             | Tafel's slope“b”<br>/(V decade <sup>-1</sup> ) | $\alpha n_a$ | Intercept of E<br>vs Log $i$ | $i^0$ mA·cm <sup>-2</sup> |
|-----------------------|------------------------------------------------|--------------|------------------------------|---------------------------|
| Pt/C                  | 0.2107                                         | 0.2806       | 0.0402                       | 41.50                     |
| Pt/WO <sub>3</sub>    | 0.3139                                         | 0.1885       | 0.2180                       | 51.26                     |
| Pt/WO <sub>3</sub> -C | 0.2859                                         | 0.2068       | 0.1211                       | 60.13                     |

**Table S8:** Rate constants of 1MCH<sub>3</sub>OH in basic medium.

| Catalysts             | Peak Current<br>Ip/(mA) | Rate Constant<br>$k_{het}/\text{cm.s}^{-1} * 10^{-5}$ |
|-----------------------|-------------------------|-------------------------------------------------------|
| Pt/C                  | 26.37                   | 15.7                                                  |
| Pt/WO <sub>3</sub>    | 27.61                   | 16.1                                                  |
| Pt/WO <sub>3</sub> -C | 43.0                    | 22.4                                                  |

**Table S9:** BET specific surface area and pore volume and pore diameter of WO<sub>3</sub>-C, WO<sub>3</sub> and C

| Catalyst Support   | BET surface(m <sup>2</sup> g <sup>-1</sup> ) | Total pore volume(cm <sup>3</sup> g <sup>-1</sup> ) | Average pore diameter(nm) |
|--------------------|----------------------------------------------|-----------------------------------------------------|---------------------------|
| WO <sub>3</sub> -C | 117.75                                       | 0.10                                                | 4.86 (This work)          |
| WO <sub>3</sub>    | 76.05                                        | 0.189                                               | 11.6[1, 2]                |
| C                  | 235                                          | 0.67                                                | 5.28[3]                   |

## References

- [1] M. Ikram, M.M. Sajid, Y. Javed, A.M. Afzal, N.A. Shad, M. Sajid, K. Akhtar, M.I. Yousaf, S.K. Sharma, H. Aslam, Crystalline growth of tungsten trioxide (WO<sub>3</sub>) nanorods and their development as an electrochemical sensor for selective detection of vitamin C, *Journal of Materials Science: Materials in Electronics*, 32 (2021) 6344-6357.
- [2] L. Horiean, T. Sakonwaree, N. Sirichaiwattananun, P. Rangsunvigit, M. Termtanun, Photodegradation of S-metolachlor using metal oxide doped tungsten oxide under visible light, *Science, Engineering and Health Studies*, (2021) 21040004-21040004.



[3] T. Maiyalagan, T.O. Alaje, K. Scott, Highly stable Pt–Ru nanoparticles supported on three-dimensional cubic ordered mesoporous carbon (Pt–Ru/CMK-8) as promising electrocatalysts for methanol oxidation, *The Journal of Physical Chemistry C*, 116 (2012) 2630-2638.
